# Supplementary material for: Fine-Tuning Grape Phytochemistry: Examining the Distinct Influence of Oak Ash and Potassium Carbonate Pre-Treatments on Essential Components
Source: MDPI journal article supplement (doi:10.3390/horticulturae10010095), 2024-01-19
Supplement: s1 [file s1]

**Supplementary material Table S1.** Phenolic compounds (µg/L) of the raisin grapes produced from the Gök Uzüüm cultivar applied the treatments Oak ash and K<sub>2</sub>CO<sub>3</sub> dipping solutions.

| Terms in the model           | Df | Sum Sq | Mean Sq | F value | Pr(>F)    |
|------------------------------|----|--------|---------|---------|-----------|
| <b>Phenolic Compounds</b>    |    |        |         |         |           |
| <b>(µg/L)</b>                |    |        |         |         |           |
| <b>Gallic acid</b>           |    |        |         |         |           |
| Treatments                   | 1  | 5.414  | 5.414   | 14.85   | 0.018 *   |
| Residuals                    | 4  | 1.458  | 0.365   |         |           |
| <b>Vanillic acid</b>         |    |        |         |         |           |
| Treatments                   | 1  | 13.015 | 13.015  | 35.09   | 0.004 **  |
| Residuals                    | 4  | 1.484  | 0.371   |         |           |
| <b>Trans-caffeic acid</b>    |    |        |         |         |           |
| Treatments                   | 1  | 12.622 | 12.62   | 23.36   | 0.008 **  |
| Residuals                    | 4  | 2.161  | 0.54    |         |           |
| <b>Trans-p-coumaric.acid</b> |    |        |         |         |           |
| Treatments                   | 1  | 16.747 | 16.747  | 85.02   | 0.000 *** |
| Residuals                    | 4  | 0.788  | 0.197   |         |           |
| <b>Ferulic acid</b>          |    |        |         |         |           |
| Treatments                   | 1  | 2.3667 | 2.3667  | 88.52   | 0.000 *** |
| Residuals                    | 4  | 0.1069 | 0.0267  |         |           |
| <b>Kaftaric acid</b>         |    |        |         |         |           |
| Treatments                   | 1  | 5.813  | 5.813   | 4.823   | 0.093     |
| Residuals                    | 4  | 4.821  | 1.205   |         |           |
| <b>Catechin</b>              |    |        |         |         |           |
| Treatments                   | 1  | 0.220  | 0.220   | 0.217   | 0.666     |
| Residuals                    | 4  | 4.062  | 1.015   |         |           |
| <b>(-)-Epicatechin</b>       |    |        |         |         |           |
| Treatments                   | 1  | 29.236 | 29.24   | 73.03   | 0.001 **  |
| Residuals                    | 4  | 1.601  | 0.40    |         |           |
| <b>Quercetin</b>             |    |        |         |         |           |
| Treatments                   | 1  | 5.497  | 5.497   | 76.11   | 0.000 *** |
| Residuals                    | 4  | 0.289  | 0.072   |         |           |
| <b>Rutin</b>                 |    |        |         |         |           |
| Treatments                   | 1  | 2.243  | 2.2430  | 4.511   | 0.101     |
| Residuals                    | 4  | 1.989  | 0.4972  |         |           |
| <b>Myricetin</b>             |    |        |         |         |           |
| Treatments                   | 1  | 1.458  | 1.4575  | 1.471   | 0.292     |
| Residuals                    | 4  | 3.962  | 0.9905  |         |           |
| <b>Tyrosol</b>               |    |        |         |         |           |
| Treatments                   | 1  | 1.800  | 1.7997  | 2.221   | 0.210     |
| Residuals                    | 4  | 3.241  | 0.8101  |         |           |

Df, degrees of freedom; Sum Sq, sums of squares; Mean Sq, mean sums of squares, \*, Significant at *p*-value <0.05; \*\*, Significant at *p*-value < 0.01; \*\*\*, Significant at *p*-value < 0.001.

**Supplementary Material Table S2.** The anthocyanin content (%) and phenolic acids (peak/IS ratio) of the raisin grapes produced from the Gök Üzümlü cultivar applied the treatments Oak ash and K<sub>2</sub>CO<sub>3</sub> dipping solutions.

| Terms in the model                     | Df | Sum Sq | Mean Sq | F value | Pr(>F)   |
|----------------------------------------|----|--------|---------|---------|----------|
| <b>Anthocyanin content</b>             |    |        |         |         |          |
| <b>Malvidin-3-o glucoside</b>          |    |        |         |         |          |
| Treatments                             | 1  | 34.65  | 34.65   | 38.66   | 0.003 ** |
| Residuals                              | 4  | 3.58   | 0.90    |         |          |
| <b>Delphinidin-3 glycoside</b>         |    |        |         |         |          |
| Treatments                             | 1  | 8.846  | 8.846   | 7.967   | 0.047 *  |
| Residuals                              | 4  | 4.441  | 1.110   |         |          |
| <b>Cyanidin-3 glycoside</b>            |    |        |         |         |          |
| Treatments                             | 1  | 4.507  | 4.507   | 12.89   | 0.022 *  |
| Residuals                              | 4  | 1.398  | 0.350   |         |          |
| <b>Petunidin-3 glycoside</b>           |    |        |         |         |          |
| Treatments                             | 1  | 82.81  | 82.81   | 33.41   | 0.004 ** |
| Residuals                              | 4  | 9.92   | 2.48    |         |          |
| <b>Malvidin-3 glycoside</b>            |    |        |         |         |          |
| Treatments                             | 1  | 52.7   | 52.68   | 0.512   | 0.514    |
| Residuals                              | 4  | 411.6  | 102.90  |         |          |
| <b>Peonidin-3 glycoside</b>            |    |        |         |         |          |
| Treatments                             | 1  | 95.47  | 95.47   | 56.48   | 0.001 ** |
| Residuals                              | 4  | 6.76   | 1.69    |         |          |
| <b>Malvidin-3-glycoside acetyl</b>     |    |        |         |         |          |
| Treatments                             | 1  | 10456  | 10456   | 20.6    | 0.010 *  |
| Residuals                              | 4  | 2030   | 508     |         |          |
| <b>Peonidin-3-glycoside acetyl</b>     |    |        |         |         |          |
| Treatments                             | 1  | 2197   | 2197.0  | 5.342   | 0.081    |
| Residuals                              | 4  | 1645   | 411.3   |         |          |
| <b>Malvidin-3-glycoside p coumaryl</b> |    |        |         |         |          |
| Treatments                             | 1  | 1007.0 | 1007.0  | 10.86   | 0.030 *  |
| Residuals                              | 4  | 370.9  | 92.7    |         |          |
| <b>Phenolic acids</b>                  |    |        |         |         |          |
| <b>Hydroxycinnamic acids</b>           |    |        |         |         |          |
| Treatments                             | 1  | 3.704  | 3.704   | 9.61    | 0.036 *  |
| Residuals                              | 4  | 1.542  | 0.385   |         |          |
| <b>Hydroxybenzoic acids</b>            |    |        |         |         |          |
| Treatments                             | 1  | 0.8649 | 0.8649  | 3.601   | 0.131    |
| Residuals                              | 4  | 0.9608 | 0.2402  |         |          |
| <b>Benzaldehyde</b>                    |    |        |         |         |          |
| Treatments                             | 1  | 3006   | 3006    | 1.474   | 0.291    |
| Residuals                              | 4  | 8154   | 2038    |         |          |
| <b>Phenylacetaldehyde</b>              |    |        |         |         |          |
| Treatments                             | 1  | 1673.4 | 1673.4  | 7.848   | 0.048 *  |
| Residuals                              | 4  | 852.9  | 213.2   |         |          |

Df, degrees of freedom; Sum Sq, sums of squares; Mean Sq, mean sums of squares, \*, Significant at *p*-value <0.05; \*\*, Significant at *p*-value < 0.01; \*\*\*, Significant at *p*-value < 0.001.

**Supplementary Material Table S3.** Flavonoids (mg/kg) and Phytoalexins (mg/kg) of the raisin grapes produced from the Gök Üzümler cultivar applied the treatments Oak ash and K<sub>2</sub>CO<sub>3</sub> dipping solutions.

| Terms in the model          | Df | Sum Sq | Mean Sq | F value | Pr(>F)    |
|-----------------------------|----|--------|---------|---------|-----------|
| <b>Flavonoids (mg/kg)</b>   |    |        |         |         |           |
| <b>Anthocyanidins</b>       |    |        |         |         |           |
| Treatments                  | 1  | 5457   | 5457    | 72.72   | 0.001 **  |
| Residuals                   | 4  | 300    | 75      |         |           |
| <b>Flavonols</b>            |    |        |         |         |           |
| Treatments                  | 1  | 456.5  | 456.5   | 20.36   | 0.010 *   |
| Residuals                   | 4  | 89.7   | 22.4    |         |           |
| <b>Flavones</b>             |    |        |         |         |           |
| Treatments                  | 1  | 1062.8 | 1062.8  | 24.94   | 0.007 **  |
| Residuals                   | 4  | 170.5  | 42.6    |         |           |
| <b>Flavanones</b>           |    |        |         |         |           |
| Treatments                  | 1  | 24.417 | 24.417  | 73.23   | 0.001 **  |
| Residuals                   | 4  | 1.334  | 0.333   |         |           |
| <b>Catechins</b>            |    |        |         |         |           |
| Treatments                  | 1  | 714.9  | 714.9   | 29.57   | 0.005 **  |
| Residuals                   | 4  | 96.7   | 24.2    |         |           |
| <b>Phytoalexins (mg/kg)</b> |    |        |         |         |           |
| <b>Resveratrol</b>          |    |        |         |         |           |
| Treatments                  | 1  | 167.15 | 167.15  | 268.5   | 0.000 *** |
| Residuals                   | 4  | 2.49   | 0.62    |         |           |
| <b>Pterostilbene</b>        |    |        |         |         |           |
| Treatments                  | 1  | 1.1635 | 1.1635  | 15.83   | 0.016 *   |
| Residuals                   | 4  | 0.2941 | 0.073   |         |           |
| <b>Piceid</b>               |    |        |         |         |           |
| Treatments                  | 1  | 0.2341 | 0.2341  | 36.02   | 0.003 **  |
| Residuals                   | 4  | 0.0260 | 0.0065  |         |           |
| <b>Viniferin</b>            |    |        |         |         |           |
| Treatments                  | 1  | 92.00  | 92.00   | 68.37   | 0.001 **  |
| Residuals                   | 4  | 5.38   | 1.35    |         |           |

Df, degrees of freedom; Sum Sq, sums of squares; Mean Sq, mean sums of squares, \*, Significant at  $p$ -value < 0.05; \*\*, Significant at  $p$ -value < 0.01; \*\*\*, Significant at  $p$ -value < 0.001.
